# Supplementary material
Source: PubMed Central journal article supplement (PMC4744506)
Supplement: NIHMS744661-supplement-1.pdf [file NIHMS744661-supplement-1.pdf]

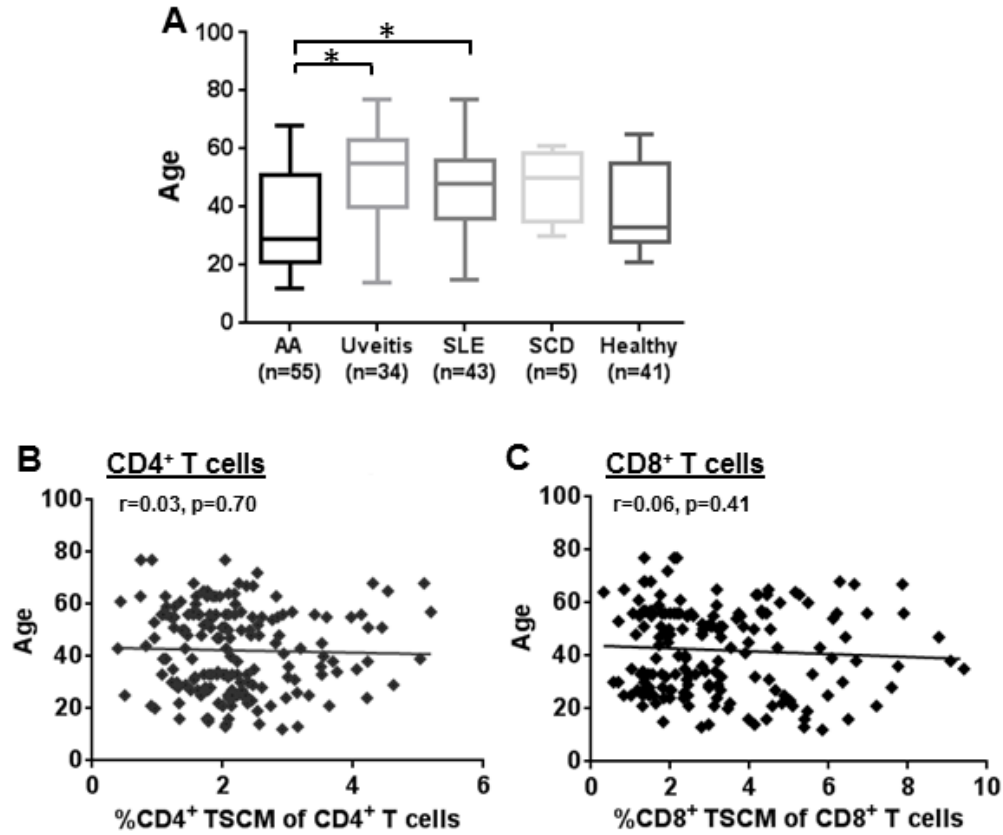

**Supplemental Fig. 1.** Correlation between TSCM frequency and age. (A) Age distributions in all disease groups. Results of correlation Spearman rank tests comparing percentages of CD4<sup>+</sup> TSCM of CD4<sup>+</sup> T cells (B) and CD8<sup>+</sup> TSCM of CD8<sup>+</sup> T cells (C) with age in all groups. \*,  $p < 0.05$ ;  $r$ , a correlation coefficient value.

Supplemental Figure 2, Hosokawa et al.

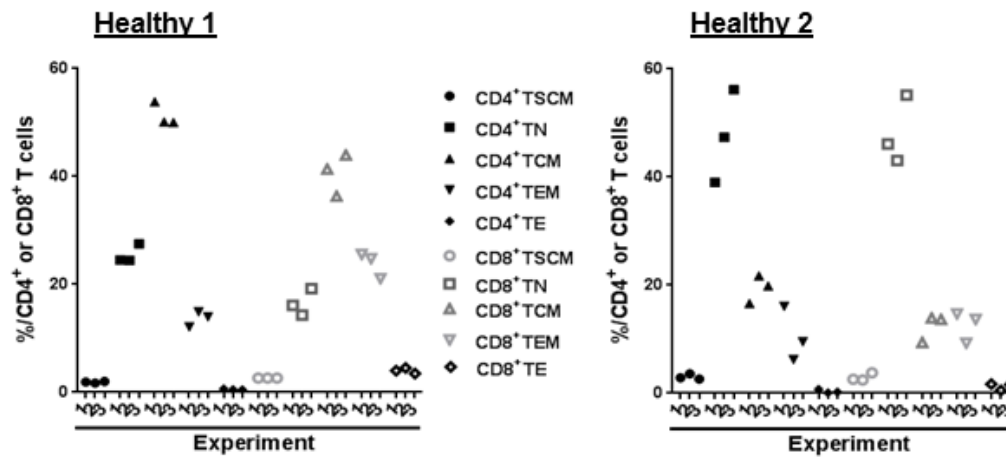

**Supplemental Fig. 2.** Frequency of T cell subsets on different dates from the same healthy donors. Shown are percentages of CD4<sup>+</sup> and CD8<sup>+</sup> naive and memory T cell subsets which were taken on 3 different dates from two healthy donors. Each number on the x axis indicates the different date of sampling from the same healthy controls.

Supplemental Figure 3, Hosokawa et al.

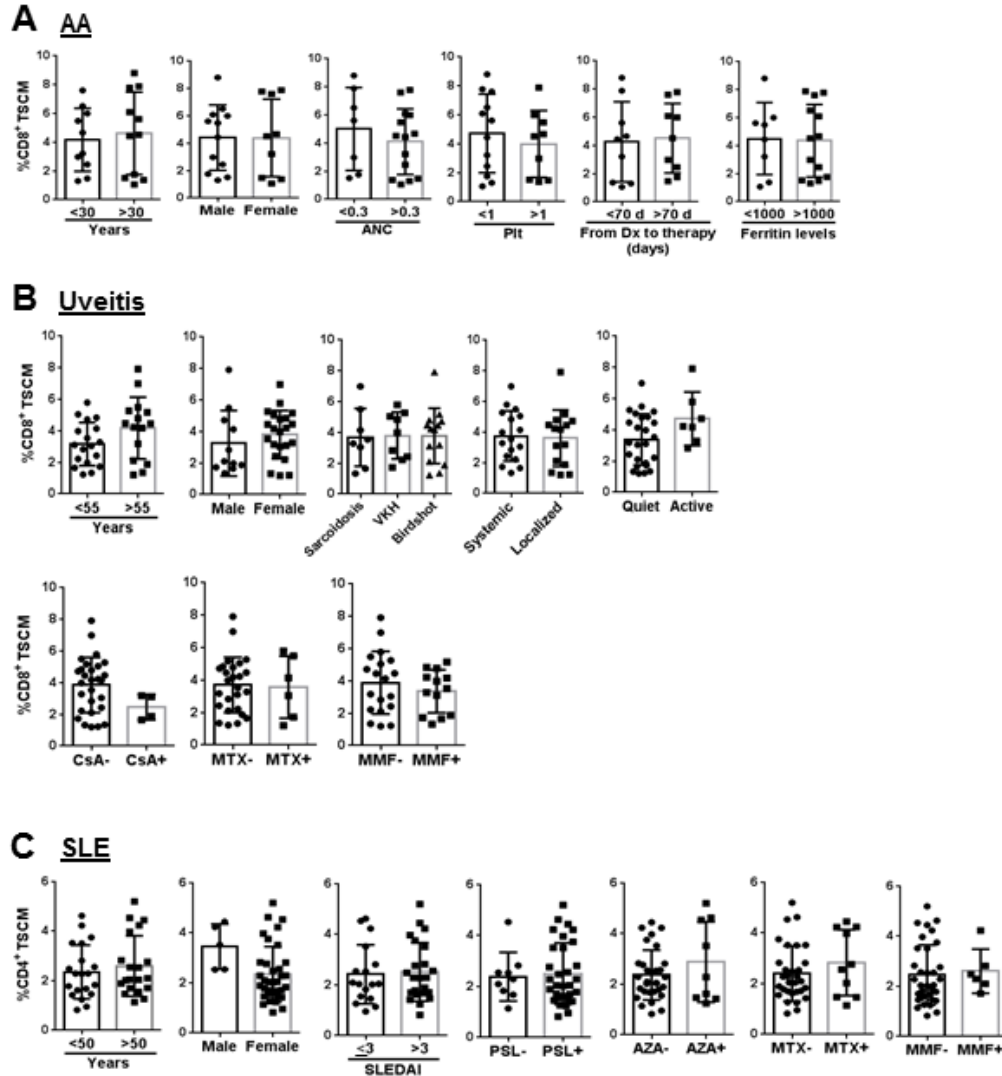

**Supplemental Fig. 3.** Clinical correlations with TSCM populations. CD8<sup>+</sup> TSCM frequency in the CD8<sup>+</sup> T cell compartment was compared between two patient groups (classified with and without some clinical parameters) in AA at diagnosis (n = 21) (**A**) or in uveitis (n = 34) (**B**). (**C**) A percentage of CD4<sup>+</sup> TSCM in the CD4<sup>+</sup> T cell compartment was compared between two groups in SLE (n = 43) in a similar manner.

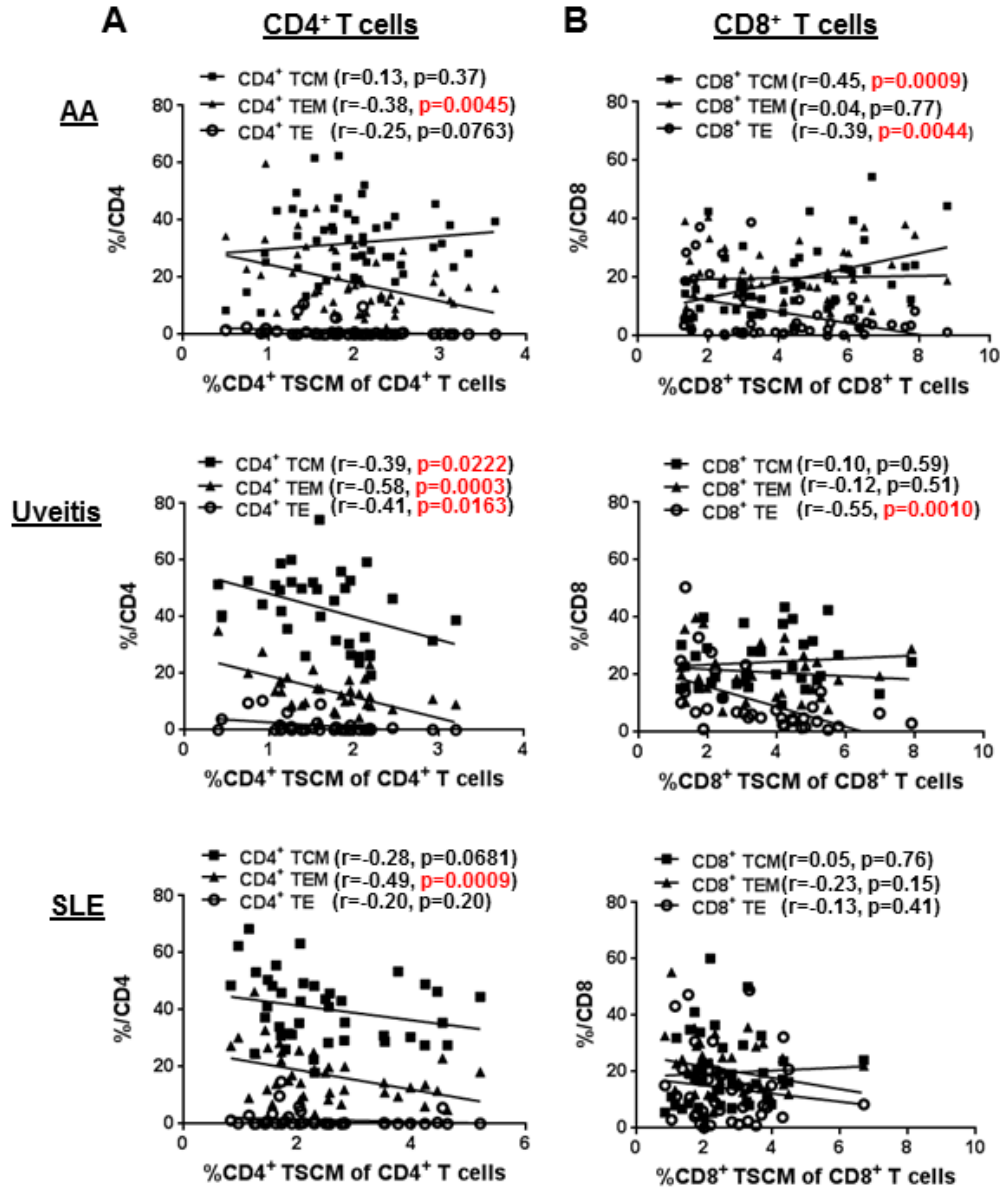

**Supplemental Fig. 4.** Frequency correlation between TSCM and other T cell subsets. Results of correlation Spearman rank tests are shown by comparison of frequencies between TSCM and TCM, TEM, or TE subset in the respective CD4<sup>+</sup> (A) or CD8<sup>+</sup> (B) T cell compartment in AA, uveitis, and SLE groups.  $r$ , a correlation coefficient value.
